# Supplementary material for: 3D Molecular Modelling Study of the H7N9 RNA-Dependent RNA Polymerase as an Emerging Pharmacological Target
Source: PubMed Central journal article supplement (PMC3800656; doi:10.1155/2013/645348), 2013-09-25
Supplement: 645348.f1.pdf [file 645348.f1.pdf]

# Supplementary Material 1

## PA Full Alignment

### (CRYSTAL STRUCTURE: RCSB entry: 2W69)

Query MEDFVRQCFNPMIVELAEKAMKEYGEDPKIETNKFAAICTHLEVCFMYSDFHFIDERGES 60  
MEDFVRQCFNPMIVELAEKAMKEYGEDKIETNKFAAICTHLEVCFMYSDFHFI+E+GES  
Sbjct MEDFVRQCFNPMIVELAEKAMKEYGEDLKIETNKFAAICTHLEVCFMYSDFHFINEQGES 67

Query IIVESGDPNALLKHRFEIIEGRDRMTMAWTVVNSICNTTGVEKPKFLPDLYDYKENRFIEI 120  
I+VE DPNALLKHRFEIIEGRDRMTMAWTVVNSICNTTG EKPKFLPDLYDYKENRFIEI  
Sbjct IVVELDDPNALLKHRFEIIEGRDRMTMAWTVVNSICNTTGAEKPKFLPDLYDYKENRFIEI 127

Query GVTRREVHIYYLEKANKIKSEKTHIHIFSFTGEEMATKADYTLDEESRARIKTRLFTIRQ 180  
GVTRREVHIYYLEKANKIKSE THIHIFSFTGEEMATKADYTLDEESRARIKTRLFTIRQ  
Sbjct GVTRREVHIYYLEKANKIKSENTHIHIFSFTGEEMATKADYTLDEESRARIKTRLFTIRQ 187

Query EMANRWLWDSFRQSERGEETIEERFEITG 209  
EMANRWLWDSFRQSERGEETIEERFEITG  
Sbjct EMANRWLWDSFRQSERGEETIEERFEITG 216

...

### (CRYSTAL STRUCTURE: RCSB entry: 2ZNL)

Query NGCIEGKLSQMSKEVNARIEPFLKTTTPRPLRLPEGPPCSQRSKFLMLDALKLSIEDPSHE 298  
NG IEGKLSQMSKEVNARIEPFLKTTTPRPLRLP GPPCSQRSKFLMLDALKLSIEDPSHE  
Sbjct NGYIEGKLSQMSKEVNARIEPFLKTTTPRPLRLPNGPPCSQRSKFLMLDALKLSIEDPSHE 60

Query GEGIPLYDAIKCMKTFFGWKEPNIVKPEHEKGINPNYLLAWKQVLAELQDIENEEKIPKTK 358  
GEGIPLYDAIKCM+TFFGWKEPN+VKPEHEKGINPNYLL+WKQVLAELQDIENEEKIPKTK  
Sbjct GEGIPLYDAIKMRTFFGWKEPNVVKPEHEKGINPNYLLSWKQVLAELQDIENEEKIPKTK 120

Query NMKKTSQLKVALGENMAPEKVDVFEDCKDVSRLRQYDSDEPEQRSLASWIQSEFNKACELT 418  
NMKKTSQLKVALGENMAPEKVDVF+DCKDV DL+QYDSDEPE RSLASWIQ+EFNKACELT  
Sbjct NMKKTSQLKVALGENMAPEKVDVDDCKDVGLKQYDSDEPELRLSLASWIQSEFNKACELT 180

Query DSSWIELDEIGEDVAPIEHASMRNYFTAESHCRATEYIMKGVYINTALLNASCAAMD 478  
DSSWIELDEIGEDVAPIEHASMRNYFT+EVSHCRATEYIMKGVYINTALLNASCAAMD  
Sbjct DSSWIELDEIGEDVAPIEHASMRNYFTSEVSHCRATEYIMKGVYINTALLNASCAAMD 240

Query DFQLIPMISKCRTKEGRRKTNLYGFIKGRSHLRNDTDVVNFVSMFSLTDPRLPHKWE 538  
DFQLIPMISKCRTKEGRRKTNLYGFIKGRSHLRNDTDVVNFVSMFSLTDPRLPHKWE  
Sbjct DFQLIPMISKCRTKEGRRKTNLYGFIKGRSHLRNDTDVVNFVSMFSLTDPRLPHKWE 300

Query KYCVLEIGDMLLRTAIGQVSRPMFLYVRTNGTSKIKMKWGMEMRRCLLQSLQQIESMIEA 598  
KYCVLEIGDML+R+AIGQVSRPMFLYVRTNGTSKIKMKWGMEMRRCLLQSLQQIESMIEA  
Sbjct KYCVLEIGDMLIRSAIGQVSRPMFLYVRTNGTSKIKMKWGMEMRRCLLQSLQQIESMIEA 360

Query ESSVKEKDMTREFENKSETWPIGESPKGVEESIGKVCRTLLAKSVFNLSYASPQLEGF 658  
ESSVKEKDMT+EFFENKSETWPIGESPKGVEE SIGKVCRTLLAKSVFNLSYASPQLEGF  
Sbjct ESSVKEKDMTKEFFENKSETWPIGESPKGVEESSIGKVCRTLLAKSVFNLSYASPQLEGF 420

Query SAESRLLLLIVQALRDNLPGTFDLGGLYEAIIEECLINDPWVLLNASWFNSFLTHAL 715  
SAESRLLLLIVQALRDNLPGTFDLGGLYEAIIEECLINDPWVLLNASWFNSFLTHAL  
Sbjct SAESRLLLLIVQALRDNLPGTFDLGGLYEAIIEECLINDPWVLLNASWFNSFLTHAL 477

## Supplementary Material 2

### PB1 Full Alignment

#### (CRYSTAL STRUCTURE: RCSB entry: 2ZNL)

Query MDVNPTLLFLKVPQAQNAISTTFPYTGDPPYSHGTGTGYTMDTVNRTHQYSEK GKWTTNSE 60  
MDVNPTLLFLKVPQAQNAISTTFPYTGDPPYSHGTGTGYTMDTVNRTHQYSEK+WTTN+E  
Sbjct MDVNPTLLFLKVPQAQNAISTTFPYTGDPPYSHGTGTGYTMDTVNRTHQYSEKGRWTTNTE 60

Query TGAPQLNPIDGPLPEDNEPSG 81  
TGAPQLNPIDGPLPEDNEPSG  
Sbjct TGAPQLNPIDGPLPEDNEPSG 81

...

#### (CRYSTAL STRUCTURE: RCSB entry: 4F7P)

Query FYRYGFVANF 505  
FORYGFVANF  
Sbjct FORYGFVANF 10

...

#### (HOMOLOGY MODEL #1 ALINGMENT. TEMPLATE:2YKG)

Query DTQIQTRRSFELKKLWEQTRSKAGLLVSDGGPNLYNIRN-----LHIPEVCLK 612  
+++I + + + +L T S A + D NL I+N + + + C+  
Sbjct ESRISDKFKYIIAQLMRDTESLAKRICKDL-ENLSQIQNREFGTQKYEQWIVTVQKACMV 293

Query WELMDEDYQGRLCNPLNPFVSHKEIESVNNNAVMPAHGPAK-SMEY 657  
+++ D+D + R+C L + SH + N+A+++ H K +++Y  
Sbjct FQMPDKDEESRICKALFLYTSH--LRKYNDALIISEHARMDALDY 337

...

#### (CRYSTAL STRUCTURE: RCSB entry: 3A1G)

Query SQRGILEDEQMYQCCNLFKFFPSSSYRRPVGISSMVEAMVSRARIDARIDFESGRIKK 737  
SQRG+LEDEQ YQ+CCNLFKFFPSSSYRRPVGISS VEA VSRARIDARIDFESGRIKK  
Sbjct SQRGVLEDEQXYQRCCNLFKFFPSSSYRRPVGISSXVEAXVSRARIDARIDFESGRIKK 60

Query EEFAEIMKICSTIEELRRQK 757  
EEF EI KICSTIEELRRQK  
Sbjct EEFTIEXKICSTIEELRRQK 80

### Supplementary Material 3

#### PB2 Full Alignment

**(CRYSTAL STRUCTURE: RCSB entry: 2ZTT)**

Query 2 ERIKELRDLMSQSRTREILTKTTVDHMAIIKKYTSG 37  
ERIKELR+L QSRTREILTKTTVDH AIIKKYTSG  
Sbjct 5 ERIKELRNLXSQSRTREILTKTTVDHXAIKKYTSG 40

...

**(HOMOLOGY MODEL #2 ALINGMENT. TEMPLATE:1GTM)**

Query PGHADLSAKEAQDVIMEVVPNEVGARILTSESQLTITKEKKEELQDCKIAPLMVAYMLE 208  
PG +++ +E ++ ++V+ P + ++T ++ I + E+ + + P + E  
Sbjct PGATNITNEELLELEVDVLAPAAI-EEVITKKNADNIKAKIVA EVANGPVTPPEADEILFE 332

Query RELVRKTRFLPVAGGTSSVYIEVLHLTQGTCW 240  
+ +++ FL AGG + Y E + G W  
Sbjct KGILQIPDFLCNAGGVTVSYFEWVQNITGYW 364

...

**(CRYSTAL STRUCTURE: RCSB entry: 4ENF)**

Query LRISSSFSFGGFTFKRTSGSSVKREEEVLTGNLQTLKIRVHEGYEEFTMVGRRATAILRK 376  
+RISSSSFSFGGFTFKRTSGSSVKREEEVLTGNLQTLKIRVHEGYEEFTMVGRRATAILRK  
Sbjct MRISSSSFSFGGFTFKRTSGSSVKREEEVLTGNLQTLKIRVHEGYEEFTMVGRRATAILRK 63

Query ATRRLIQLIVSGRDEQSIAEAIIVAMVFSQEDCMIKAVRGDLNFVNRRANQRLNPMHQLLR 436  
ATRRLIQLIVSGRDEQSIAEAIIVAMVFSQEDCMIKAVRGDLNFVNRRANQRLNPMHQLLR  
Sbjct ATRRLIQLIVSGRDEQSIAEAIIVAMVFSQEDCMIKAVRGDLNFVNRRANQRLNPMHQLLR 123

Query HFQKDAKVLVFNWVGIEPIDNVMGMIGILPDMPSTEMSLRGIRVSKM 483  
HFQKDAKVLVFNWG+EPIDNVMGMIGILPDMPST EMS+RG+R+SKM  
Sbjct HFQKDAKVLVFNWGVPEPIDNVMGMIGILPDMPSTSIEMSMRGVIRSKM 170

...

**(CRYSTAL STRUCTURE: RCSB entry: 3L56)**

Query EINGPESVLVNTYQWIIRNWETVKIQWSQDPTMLYNKMEFEPFQSLVPKAARGQYSGFVR 597  
EINGPESVLVNTYQWIIRNWETVKIQWSQDPTMLYNKMEFEPFQSLVPKAARGQYSGFVR  
Sbjct EINGPESVLVNTYQWIIRNWETVKIQWSQDPTMLYNKMEFEPFQSLVPKAARGQYSGFVR 60

Query TLFQQMRDVLGTFDVTQIIKLLPFAAAPPEQSRMQFSSLTVNVRGSGMRILVRGNPVSFN 657  
TLFQQMRDVLGTFDVTQIIKLLPFAAAP+QSRMQFSSLTVNVRGSGMRILVRGNPVSFN  
Sbjct TLFQQMRDVLGTFDVTQIIKLLPFAAAPPKQSRMQFSSLTVNVRGSGMRILVRGNPVSFN 120

Query YTKTTKRLTVLGKDAGALTEDPDEGTAGVESAVLRGFLILGKEDKRYGPALSINELSNLA 717  
Y K TKRLTVLGKDAGALTEDPDEGTAGVESAVLRGFLILGKEDKRYGPALSINELSNLA  
Sbjct YNKATKRLTVLGKDAGALTEDPDEGTAGVESAVLRGFLILGKEDKRYGPALSINELSNLA 180

Query KGEKANVLIGQGDVVLVLMKRKRDRSSILTDSQTATKRIRMAIN 759  
KGEKANVLIGQGDVVLVLMKRKRDRSSILTDSQTATKRIRMAIN  
Sbjct KGEKANVLIGQGDVVLVLMKRKRDRSSILTDSQTATKRIRMAIN 222
